# Supplementary material for: Programmable Polyproteams of Tyrosine Ammonia Lyases as Cross-Linked Enzymes for Synthesizing p-Coumaric Acid
Source: MDPI journal article supplement (doi:10.3390/biom12070997), 2022-07-18
Supplement: s1 [file s1]

## Supporting Information

### **Programmable Polyproteins of Tyrosine Ammonia Lyases as Cross-linked Enzymes for Synthesizing *p*-Coumaric Acid**

Mingyu Jia<sup>1</sup>, Zhiyuan Luo<sup>1</sup>, Haomin Chen<sup>1</sup>, Bianqin Ma<sup>1</sup>,

Li Qiao<sup>1,\*</sup>, Qinjie Xiao<sup>1</sup>, Pengfei Zhang<sup>1</sup>, Anming Wang<sup>1,\*</sup>

<sup>1</sup>*College of Materials, Chemistry and Chemical Engineering,*

*Hangzhou Normal University, Hangzhou 311121, P. R. China*

Corresponding author:

Dr. Anming Wang

College of Materials, Chemistry and Chemical Engineering,

Hangzhou Normal University, Hangzhou 310036, P. R. China

Tel: +86-571-28865978

E-mail: waming@hznu.edu.cn; 11837066@zju.edu.cn

## Contents

|                                                                                        |    |
|----------------------------------------------------------------------------------------|----|
| 1. Materials .....                                                                     | 1  |
| 2. The structure of SpyTag-SpyCatcher .....                                            | 2  |
| 3. Primers used for DNA fragment .....                                                 | 2  |
| 4. Protein expression and purification.....                                            | 8  |
| 5. Effect of different concentrations of glutaraldehyde on enzyme<br>aggregation ..... | 9  |
| 6. Standard curve of <i>p</i> -Coumaric acid .....                                     | 10 |
| 7. SEM characterization of <i>TAL-CLEs</i> .....                                       | 10 |
| 8. TEM characterization of <i>TAL-CLEs</i> .....                                       | 11 |
| 9. CLSM characterization of <i>TAL-CLEs</i> .....                                      | 12 |
| 10. FT-IR characterization of WtTAL and <i>TAL-CLEs</i> .....                          | 13 |
| 11. HPLC analysis images.....                                                          | 14 |

## 1. Materials

The strains (*E. coli* DH5 $\alpha$  and *E. coli* BL21) and plasmid pET-28a(+) (contains a inbuilt His-tag gene) used in the study were obtained from laboratory storage. The TAL genes and PCR primers used in this study were all synthesized by Shanghai Generay Biotech Co. Ltd. The endonuclease and protein markers used were purchased from Takara Products of Hangzhou Haofeng Biotechnology Co., Ltd. The target gene SpyTag and SpyCatcher was linked by PCR. The plasmid construction results were sent to Youkang Biotechnology Co., Ltd. Antibiotics (kanamycin) were purchased from Sangon Biotech. L-Arabic sugar was purchased from Sangon Biotech. All other chemical reagents were purchased from Sinopharm Chemical Reagent Ltd. (Shanghai) unless otherwise stated. In our experiment, deionized water was used as a solvent to prepare the Tris-HCl buffer solution.

## 2. The structure of SpyTag-SpyCatcher

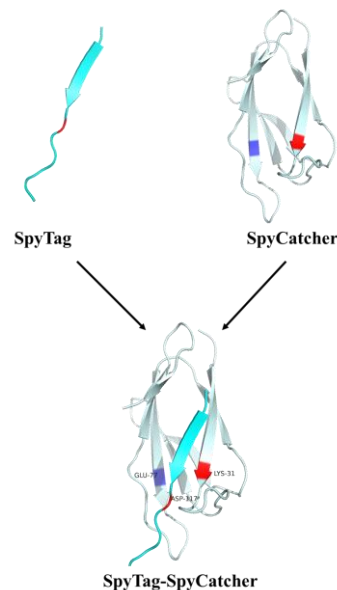

**Figure S1** The domain of the SpyTag and SpyCatcher complex (PDB: 4MLI)

## 3. Primers used for DNA fragment

First, to obtain TAL fragment, the first round PCR was performed with TAL gene between the restriction site of NdeI and XhoI of pET-28a(+) vector as the template, and by using primers forward primer TAL F1 (5'-GGGAATTCCATATGC CGAGCCGTATTG-3') and reverse primer TAL R1 (5'-CTCAGGGTATCAACCA TAGCTCCGCTGCCACCACTCCCTGCTTTAATGCTTTTAACCAG-3'). SpyCatcher fragment was obtained using pET-28a(+)-SpyCatcher as template and forward primer SpyCatcher F1 (5'-GCTATGGTTGATACCCTGAG-3') and reverse primer SpyCatcher R1

(5'-CCGCTCGAGTTAAATATGTGCATCACCTTTGG-3') as primers. In order to obtain SpyCatcher-TAL, the TAL fragment and SpyCatcher fragment obtained by the first-round PCR were used as templates, and TAL-SpyCatcher F1 (5'-GGGAATTCCATATGCCGAG-3') and TAL-SpyCatcher R1 (5'-CCGCTCGAGTTAAATATGTG-3') were used as primers. The PCR was then performed with the TAL-SpyCatcher fragment as the template, SpyTag-TAL-SpyCatcher F1 (5'-TGCCTATAAACCGACCAAAGGTTTCAGGGGG TTCCGGTCCGAGCCGTATTGACTACT-3') and SpyTag-TAL-SpyCatcher R1 (5'-AATATGTGCATCACCTTTGG-3') as primers, and the PCR product was purified as the template for the next round of PCR. The primers for the next round of PCR were SpyTag-TAL-SpyCatcher F2 (5'-CATGCCATGGCACATATTGTTATGG TTGATGCCTATAAACCGACCAAAG-3') and SpyTag-TAL-SpyCatcher R2 (5'-CCGCTCGAGTTAGTGATGATGATGATGGCTGCTGCCAATATGT GCATCACCTTTGG-3'). It is important to emphasize here that the plasmid we used, pET-28a(+), has a His tag gene between the NcoI and NdeI enzyme cut sites. The wild-type TAL gene was constructed between the NdeI and XhoI enzyme cut sites behind the His-tag gene when using pET-28a(+) as the gene vector. And to avoid the potential for unwanted effects when the His-tag is at the front of the SpyTag, we constructed the SpyTag-TAL-SpyCatcher gene inserted directly between NcoI and XhoI, and added the His-tag

(sequence in italics and bold) at the end of the gene by overlap extension PCR. We required a fragment encoding SpyTag or SpyCatcher in combination with a fragment encoding TAL (with each fragment joined via a GSGGSG linker).

**Table S1** Primers used in this study

| Name                          | Sequence (5'→3')                                                         |
|-------------------------------|--------------------------------------------------------------------------|
| TAL F1                        | GGGAATTCCATATGCCGAGCCGTATTG                                              |
| TAL R1                        | CTCAGGGTATCAACCATAGCTCCGCTGCCACCA<br>CTCCCTGCTTTAATGCTTTTAACCAG          |
| SpyCatcher F1                 | GCTATGGTTGATACCCTGAG                                                     |
| SpyCatcher R1                 | CCGCTCGAGTTAAATATGTGCATCACCTTTGG                                         |
| TAL- SpyCatcher F1            | GGGAATTCCATATGCCGAG                                                      |
| TAL- SpyCatcher R1            | CCGCTCGAGTTAAATATGTG                                                     |
| SpyTag-TAL-<br>SpyCatcher F1  | TGCCTATAAACCGACCAAAGGTTTCAGGGGGTTC<br>CGGTCCGAGCCGTATTGACTACT            |
| SpyTag-TAL-<br>SpyCatcher R1  | AATATGTGCATCACCTTTGG                                                     |
| SpyTag -TAL-<br>SpyCatcher F2 | CATGCCATGGCACATATTGTTATGGTTGATGCCT<br>ATAAACCGACCAAAG                    |
| SpyTag -TAL-<br>SpyCatcher R2 | CCGCTCGAGTTA <b>GTGATGATGATGATGATG</b> GCTG<br>CTGCCAATATGTGCATCACCTTTGG |

**Table S2** Gene sequence

| Gene | Sequence (5'→3')                                                                                                                                                                                                                                                                                                                                                                                                                                                                                                                                                                                                                                                                                                                                                        |
|------|-------------------------------------------------------------------------------------------------------------------------------------------------------------------------------------------------------------------------------------------------------------------------------------------------------------------------------------------------------------------------------------------------------------------------------------------------------------------------------------------------------------------------------------------------------------------------------------------------------------------------------------------------------------------------------------------------------------------------------------------------------------------------|
| TAL  | ATGCCGAGCCGTATTGACTACTACACCAGCAGC<br>GGGAACGGGTACGCCCAGAGCCGTAAAAGCAG<br>CGCCATTTATCCGGCGAGCGCCAGCACCGGGCA<br>CGCAGCACCTAGCACCGAACGTAAACCGGAAC<br>TGCTGGACAAATTTGTTGAAGCATACGATGAACT<br>GCAGAGCTATCGCGAAGGAAAACCGGTTATTGT<br>TGATGGTCACAATCTGAGCATTCCGGCCGTAGCA<br>GCAACCGCACGTTTTGGTGCTGCAGTGGCGCTG<br>GATGAAAATCCGGAAACACATGAACGTGTACTG<br>CAGAGCCGTCGTGTTATTGTTGACAAAGTGAGC<br>ACACAGCGTTCAGTTTATGGAGTTAGTACCGGTT<br>TTGGTGGTAGCGCAGATACCCGTACCAGCGATCC<br>GCTGCAGCTGGGTCACGCTCTGCTGCAGCATCA<br>GCATGTTGGCGTTCTGCCGACCCAGACCGAGAG<br>TCCGCTGCCGGCACTGCCTCTGGGTGATCCTCTG<br>GCCACCACCTCAATGCCAGAAGCATGGGTTCGT<br>GGTGCCATTCTGATTCTGATGAATTCAGTATTCG<br>TGGTCATAGCGGTGTTTCGTTGGGAACTGATTGAA<br>AAAATGGGTGAACTGCTGCGTGAAAATATTACC<br>CCGCTGGTTCCGCTGCGTGGTAGCATTAGCGCAA |

---

GCGGTGATCTGAGCCCGCTGAGCTATATTGCAGG  
TACACTGATTGGTAGCCCGGCAATTCGTGTTTTT  
GATGGTCCGGCAAGCTATGGTGCACGTCGTATTC  
TGCCGAGCAATATTGCACTGGCAAATCATGGTGT  
TGCACCGATTCCGCTGAGCAGCAAAGAACATCT  
GGGTATTCTGAATGGTACAGCATTTAGCGCAAGC  
GTTGGTGCACCTGGCACTGAATGAAGCAGTTCAT  
CTGAGCCTGCTGGCACAGGTTTGTACCGCAATG  
GGTACAGAAGCAATGATTGGTGCAGTTGGTAGC  
TTTGATGCATTTATTCATGATACCGCACGTCCGCA  
TCCGGGTCAGGTTGAAGTTGCACGTAATGTTTCGT  
ACCCTGCTGGAAGATAGCCAGATGGCAGTTAAA  
GCAGAAGATGAAGTTCATATTGCAGAAGATGAA  
GGTGAACCTGCGTCAGGATCGTTATCCGCTGCGTA  
CCGCAGCACAGTTTCTGGGTCCGCAGATTGAAG  
ATATTCTGAGCGCACATGAAACCGTTACCCTGGA  
ATGTAATAGCACCACCGATAATCCGCTGATTGAT  
GGTGAAACCGGTACAGTTCATCATGGTGGTAATT  
TTCAGGCAATGGCAGTTACCAATGCAATGGAAA  
AAACCCGTCTGGCAATTCATCATATTGGTAAACT  
GCTGTTTGCACAGGCAACCGAACTGATTAATCC  
GATGATGAATCGTGGTCTGCCGCCGAATCTGGC

---



---

AGCAACCGATCCGAGCCATAATTATTTTGCAAAA  
GGTATTGATATTCATCTGGCAGCATACGTTGGTG  
AACTGGGTTTTCTGGCAAGCCCGGTTAGCAGCC  
ATATTCAGAGCGCAGAAATGCATAATCAGGCAG  
TTAATAGCCTGGCACTGGTTAGCGCACGTTATAC  
CATTAGCGCACTGGATGTTCTGAGCCTGCTGACC  
GCAGCATATCTGTATGTTCTGTGTCAGGCACTGG  
ATCTGCGTGCAATGCATAATGATCTGCAGAGCAG  
CCTGAGCGCAATTGTTTCGTGAACTGCTGCCGAA  
ACATTTTCCGAGCGCAGCAAAACGTGCAGATGC  
ACTGCTGCCGATTCTGGAACGTACCATTTTTCGT  
GCACTGAATAGCAGCAGCAGCGCAGATTGTAAA  
GCACGTATGGTTAGCGTTGCAGCAAGCACCACC  
ACCCCGCTGGTTGATTTTCTGAGCGCAGATGCAG  
CACTGGCAAGCGAACTGGCAAATATTACCGCAT  
TTCGTACCGATCTGGCAACCCGTGCAGCAGATG  
CACTGACCACCCTGCGTACCCAGTATCTGGAAG  
GTGCACGTGGTGCAGCACCGGCAAGCAAATATC  
TGGGTAAAACCCGTCCGGTTTATGAATTTGTTTCG  
TGTTACCCTGAATGTTCCGATGCATGGTCGTGAA  
AATCTGCATAATTTTGAAATGGGTCCGGGTGTTG  
AAGATGGTATTATTGGTAATAATATTAGCACCATT

---

|            |                                       |
|------------|---------------------------------------|
|            | TATGAAGCAATTCGTGATGGTAAAATGCAGAAT     |
|            | GTTGTTATGCAGCTGGTTAAAAGCATTAAAGCAT    |
|            | AA                                    |
|            | GCTATGGTTGATACCCTGAGCGGCCTGTCTAGCG    |
|            | AACAGGGTCAGAGCGGCGATATGACCATTGAAG     |
|            | AAGATAGTGCAACCCATATTAAATTTTCTAAACG    |
|            | CGATGAAGATGGCAAAGAACTGGCCGGCGCCA      |
|            | CTATGGAACTGCGCGATAGCTCAGGTAAAACCA     |
| SpyCatcher | TTTCAACCTGGATTAGTGATGGTCAGGTAAAGA     |
|            | TTTTTATCTGTATCCGGGCAAATATACCTTTGTGG   |
|            | AAACCGCAGCCCCGGATGGCTATGAAGTTGCAA     |
|            | CCGCAATTACCTTTACCGTTAATGAACAGGGCCA    |
|            | GGTTACCGTTAATGGTAAAGCCACCAAAGGTGA     |
|            | T   G   C   A   C   A   T   A   T   T |
|            | GCACATATTGTTATGGTTGATGCCTATAAACCGA    |
| SpyTag     | CCAAA                                 |

#### 4. Protein expression and purification

Formula of Luria-Bertani (LB) medium: 1 % NaCl, 1 % peptone, 0.5 % yeast extract, and 50 µg/mL Kanamycin. The cell extracts of BL21 were loaded to the Ni-NTA agarose column, which was previously equilibrated with 50

mM phosphate buffer (pH 8.5) containing 300 mM NaCl. To remove nonspecific and unbound proteins, 50 mM phosphate buffer (pH 8.5) containing 300 mM NaCl and 30 mM imidazole was used to wash the column. The protein of interest (TAL or SpyTag-TAL-SpyCatcher) was eluted with 0.1 M phosphate buffer (pH 8.5) containing 300 mM NaCl and 200 mM imidazole. The purified protein was analyzed by SDS-PAGE. Protein concentrations were measured by Bradford analysis.

## **5. Effect of different concentrations of glutaraldehyde on enzyme aggregation**

Saturated ammonium sulfate was chosen as the aggregation agent for CLEs-GA preparation. For further tests CLEs-GA were prepared using different concentrations of glutaraldehyde (0.4 wt%, 0.8 wt%, 1.2 wt%, 1.6 wt%, 2.0 wt%, 2.4 wt%).

$$\text{Activity Recovery (\%)} = \frac{\text{Total Activity of CLEs} - \text{GA}}{\text{The Initial Activity of Wt} - \text{TAL}} \times 100$$

As shown in Table S3, the activity recovery in the CLEs-GA first increased with increasing glutaraldehyde concentration, presumably due to a decrease in initial enzyme leakage. The maximum recovery was found at 1.2 wt% glutaraldehyde concentration. At a glutaraldehyde concentration > 1.2 wt% the activity recovery declined again. This decrease in enzyme activity may be due to the change in the quaternary structure of the enzyme because more intensive crosslinking. Thus, we chose 1.2 wt% concentration of

glutaraldehyde to prepare CLEs-GA.

Table S3 Activity recovery of different glutaraldehyde concentrations on enzyme aggregation

| Glutaraldehyde concentration | 0.4 wt% | 0.8 wt% | 1.2 wt% | 1.6 wt% | 2.0 wt% | 2.4 wt% |
|------------------------------|---------|---------|---------|---------|---------|---------|
| Activity recovery (%)        | 7.74%   | 10.01%  | 13.37%  | 11.35%  | 11.35%  | 5.76%   |

## 6. Standard curve of *p*-Coumaric acid

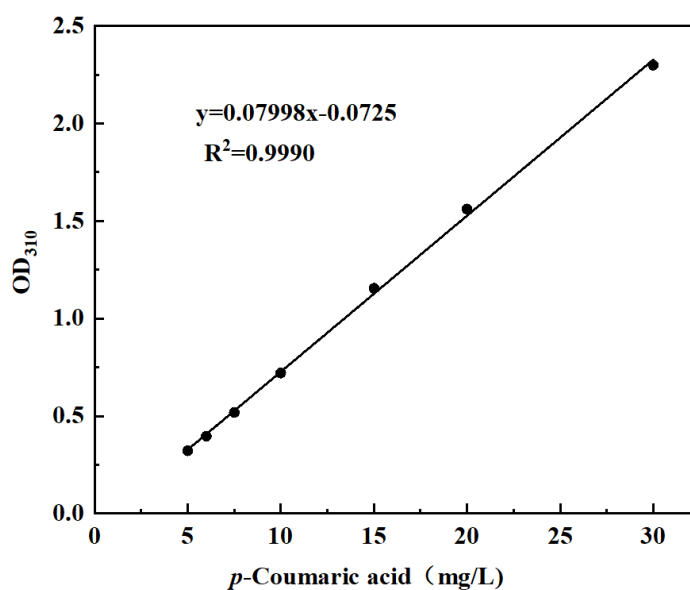

Figure S2 Standard curve of *p*-Coumaric acid

## 7. SEM characterization of *TAL-CLEs*

The *TAL-CLEs* were prepared by shaking at 220 rpm for 3 hours at 18 °C

and separated by centrifugation. After drying, the samples were observed with a scanning electron microscope (JEOL-5600LV), and microscopic images were obtained under a 3.0 kV scanning electron microscope.

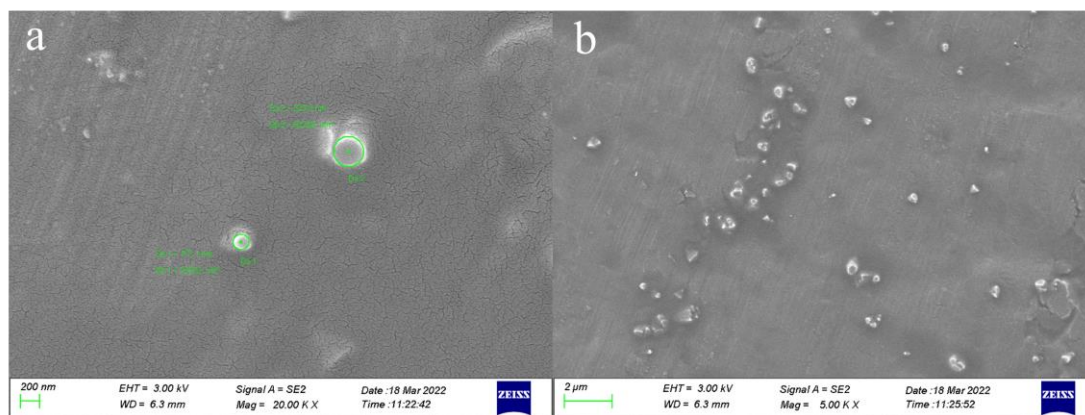

**Figure S3** Scanning Electron Microscopy (SEM) images of *TAL-CLEs*

## 8. TEM characterization of *TAL-CLEs*

When characterizing the obtained *TAL-CLEs* using transmission electron microscope (TEM), samples were diluted to final concentrations between 0.5 and 2 nM and adsorbed on glow discharged Formvar-supported carbon-coated Cu400 TEM grids (Science Services, Munich). TEM measurements were performed on a JEOL model JEM-3010 at 100 kV.

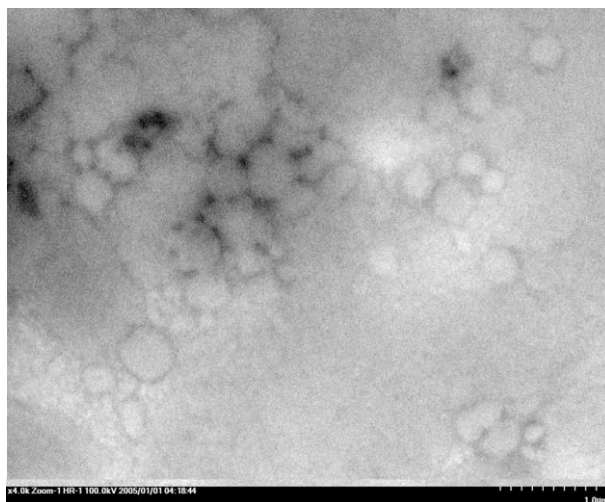

**Figure S4** Transmission Electron Microscope (TEM) images of *TAL-CLEs*

## **9. CLSM characterization of *TAL-CLEs***

The *TAL-CLEs* were stained with fluorescent isothiocyanate (FITC) for 12 hours at 4 °C, 1 mg *TAL-CLEs* to 0.01 mg FITC. And then, the sample is washed with pH 8.0 buffer to wash excess dye, and finally a small amount of sample is dropped on the glass slide to air dry, and the cover glass is covered. The *TAL-CLEs* was observed by a laser scanning confocal microscope (Olympus FV 1000 CLSM). The enzyme protein obtained green fluorescence in the range of 480~540 nm under 405 nm excitation.

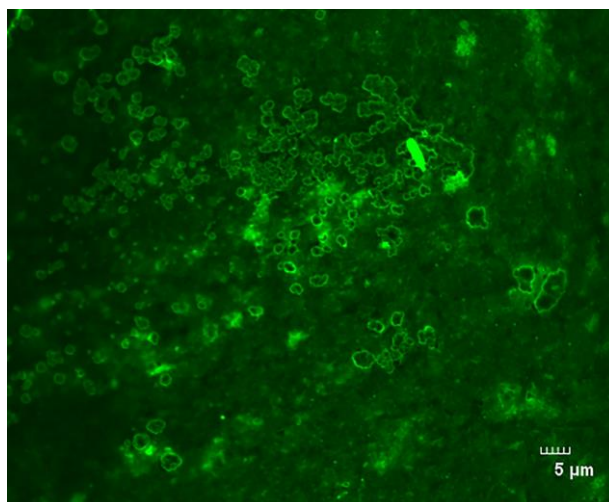

**Figure S5** Confocal Laser Scanning Microscopy (CLSM) images of *TAL-CLEs*

## **10. FT-IR characterization of WtTAL and *TAL-CLEs***

The CLEs were prepared by shaking at 220 rpm for 3 hours at 18 °C and separated by centrifugation. And the wild type enzymes were collected and concentrated in an ultrafiltration tube after they purified by Ni-NTA agarose. Finally, all protein samples were lyophilized and grinding mixed with KBr (protein mass : KBr mass = 1 : 100). The obtained samples were analyzed by Fourier Transform Infrared Spectrometer.

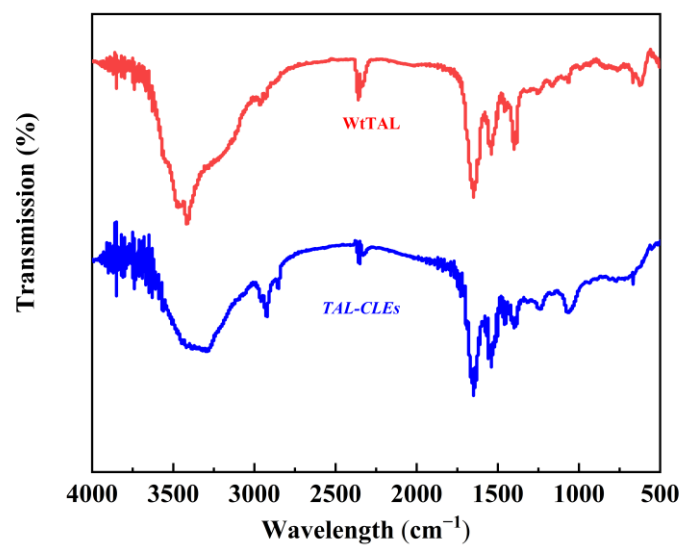

Figure S6 FT-IR spectra of TAL and *TAL-CLEs*

## 11. HPLC analysis images

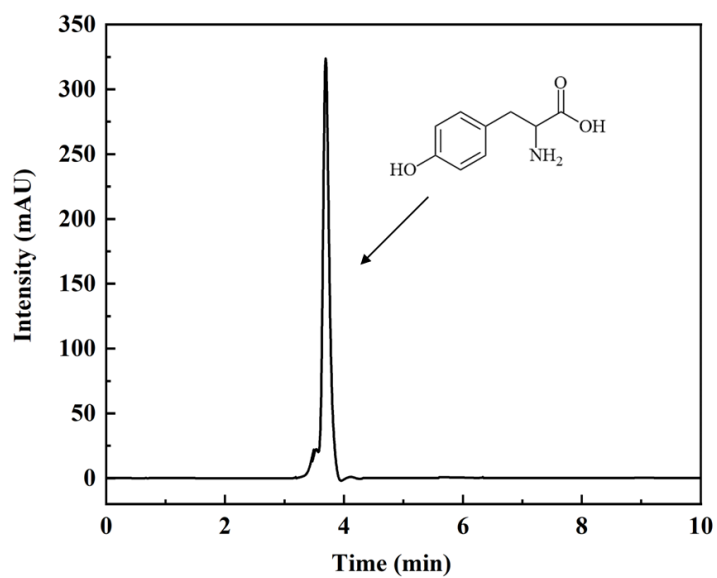

Figure S7 HPLC analysis of tyrosine.



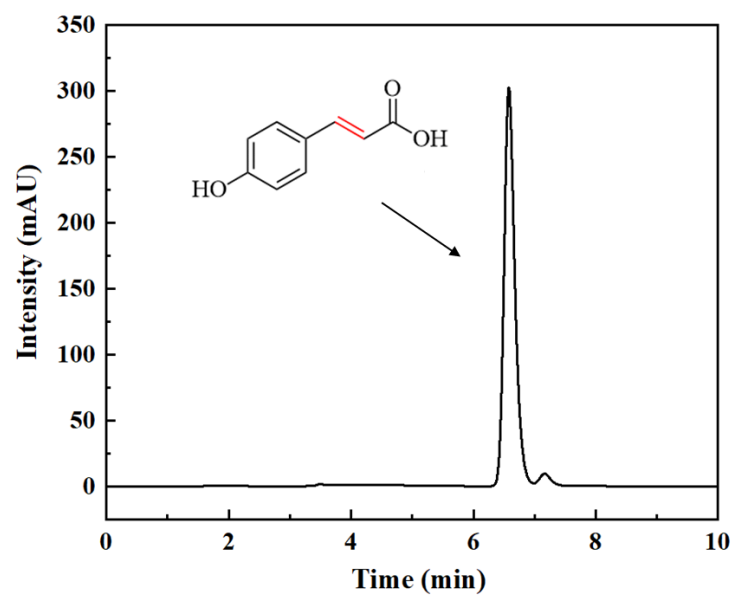

**Figure S8** HPLC analysis of *p*-Coumaric acid.
